# Supplementary figures and images for: Metabolomics of Two Pecan Varieties Provides Insights into Scab Resistance
Source: MDPI journal article supplement (doi:10.3390/metabo8040056), 2018-09-23

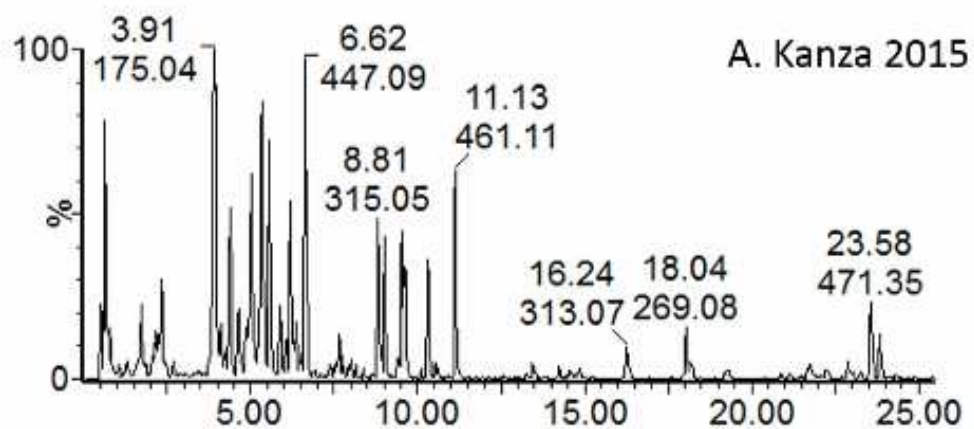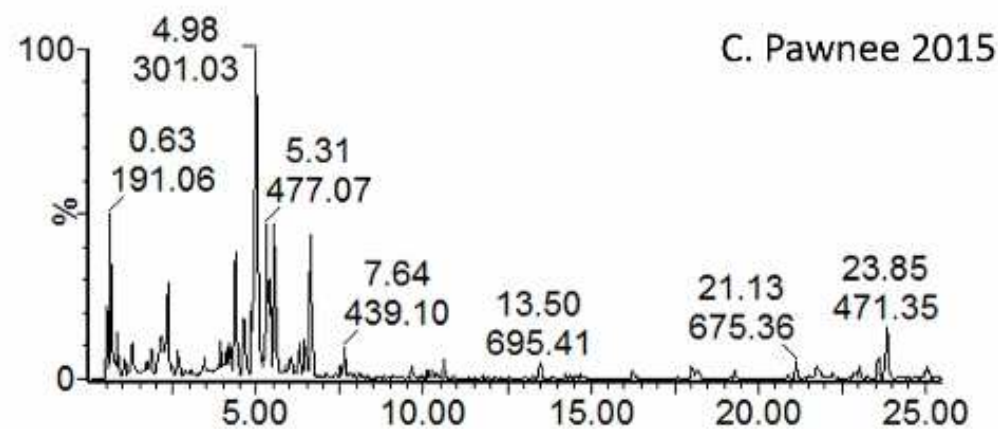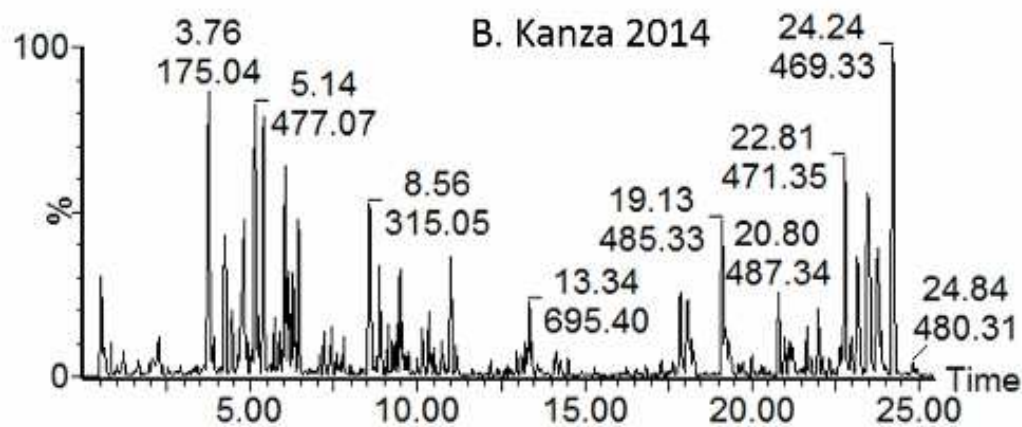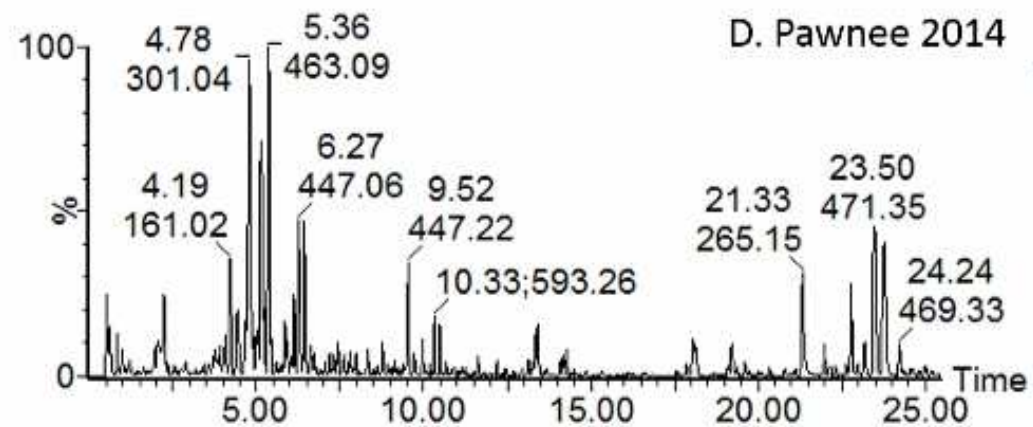

Supplement: s1 [file s1]

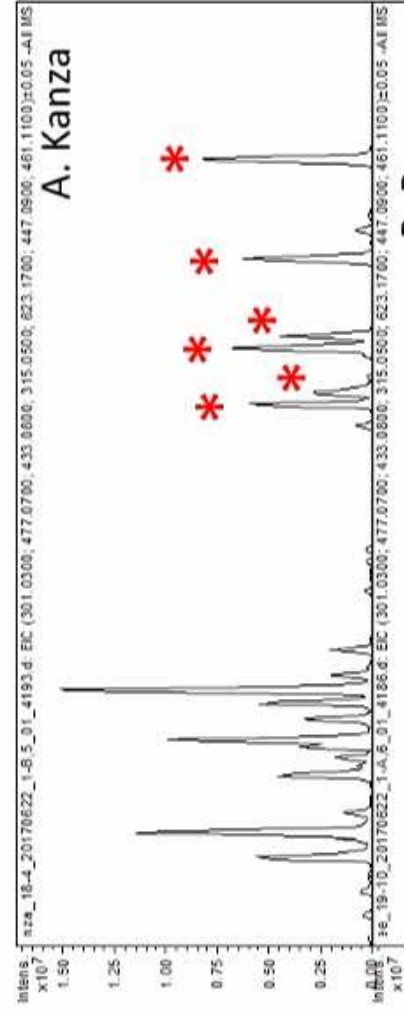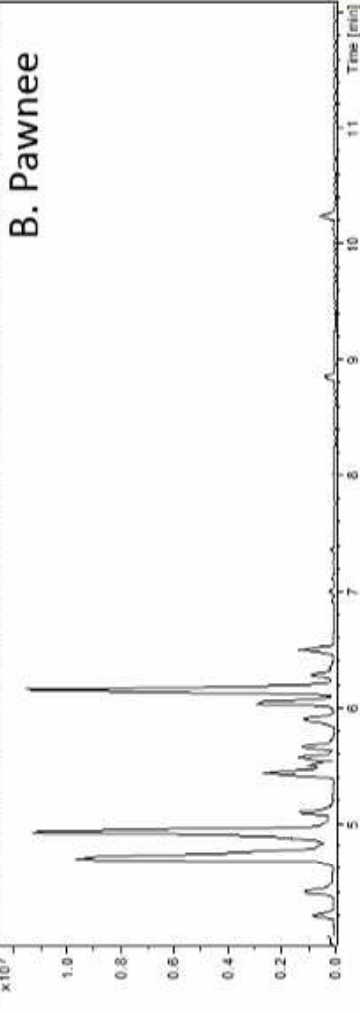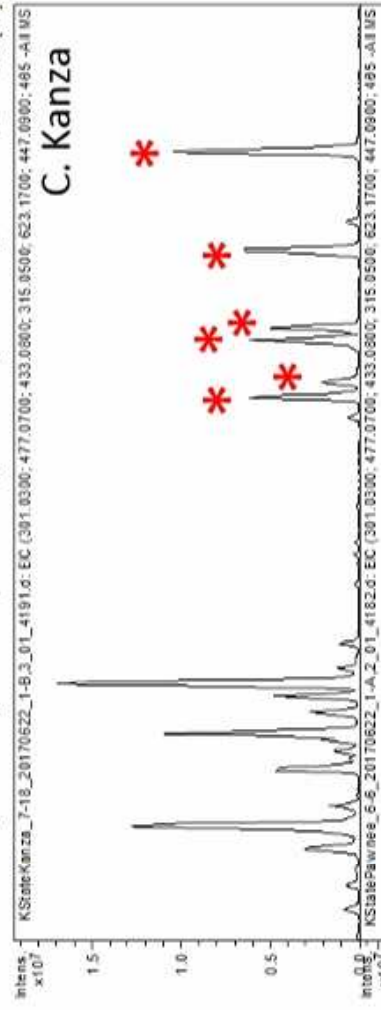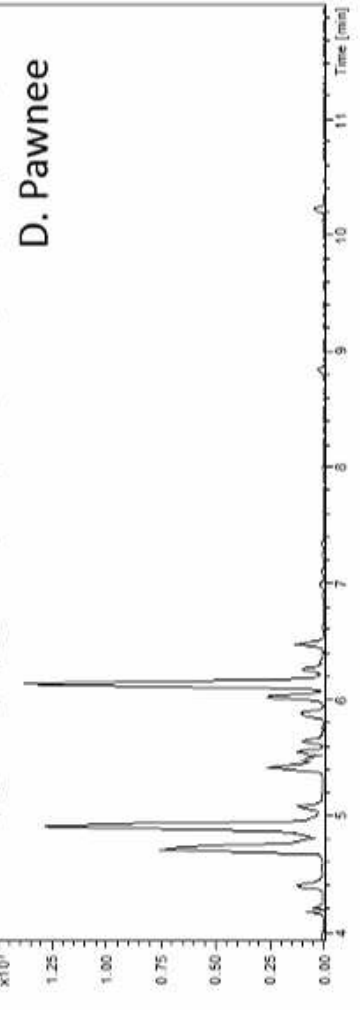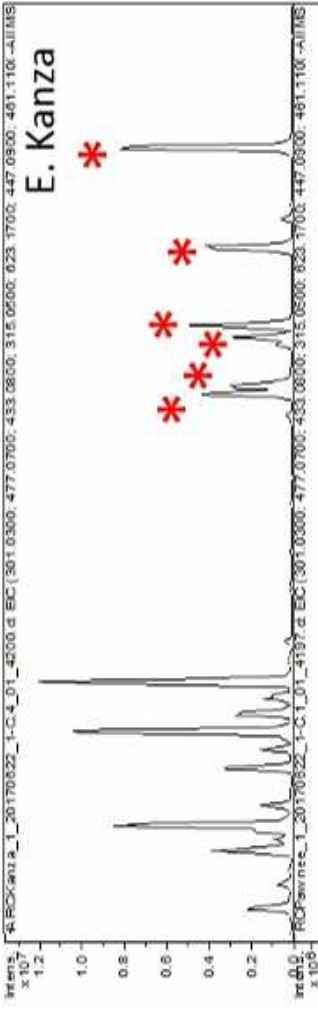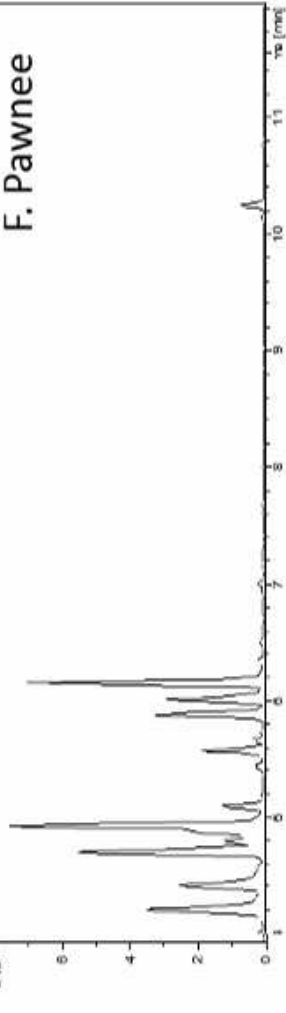

Supplement: s1 [file s1]

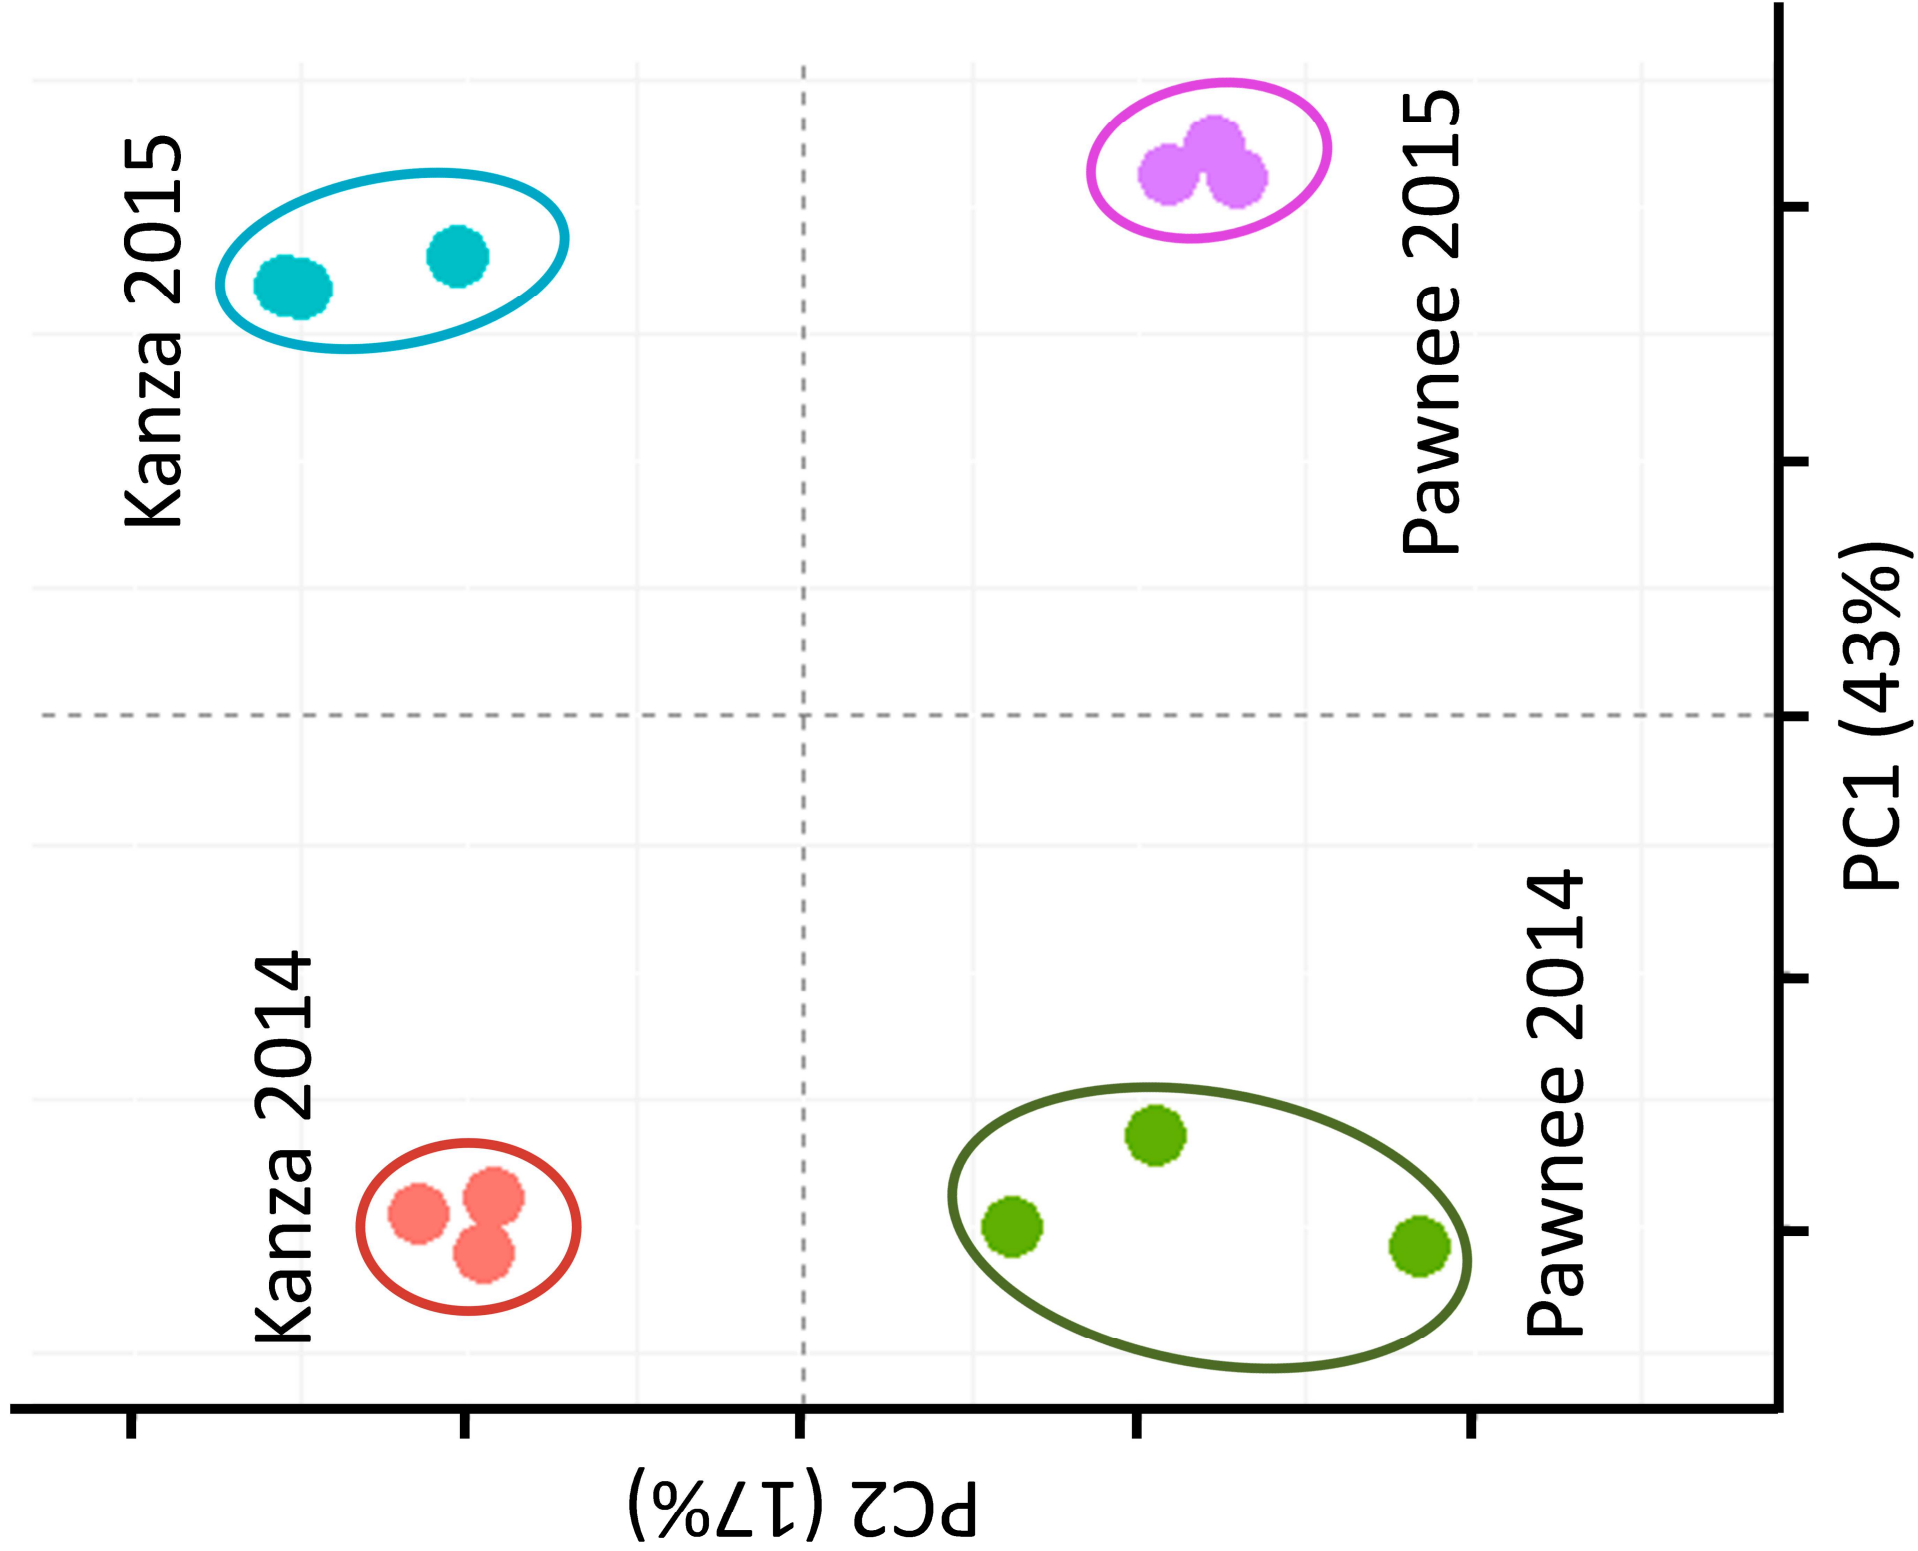

Supplement: s1 [file s1]

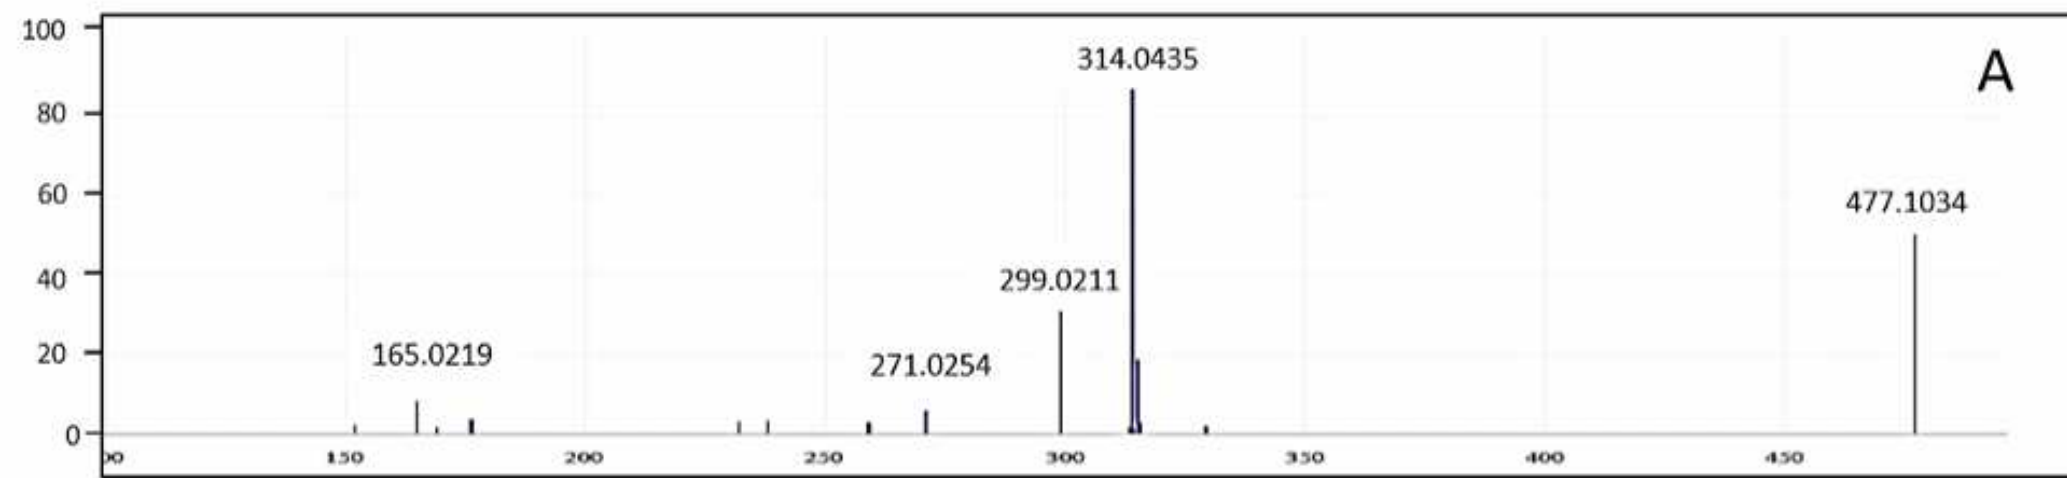

18Aug15\_K20\_DDA\_MSMS 418 (9.650)

2: TOF MSMS 475.01ES-

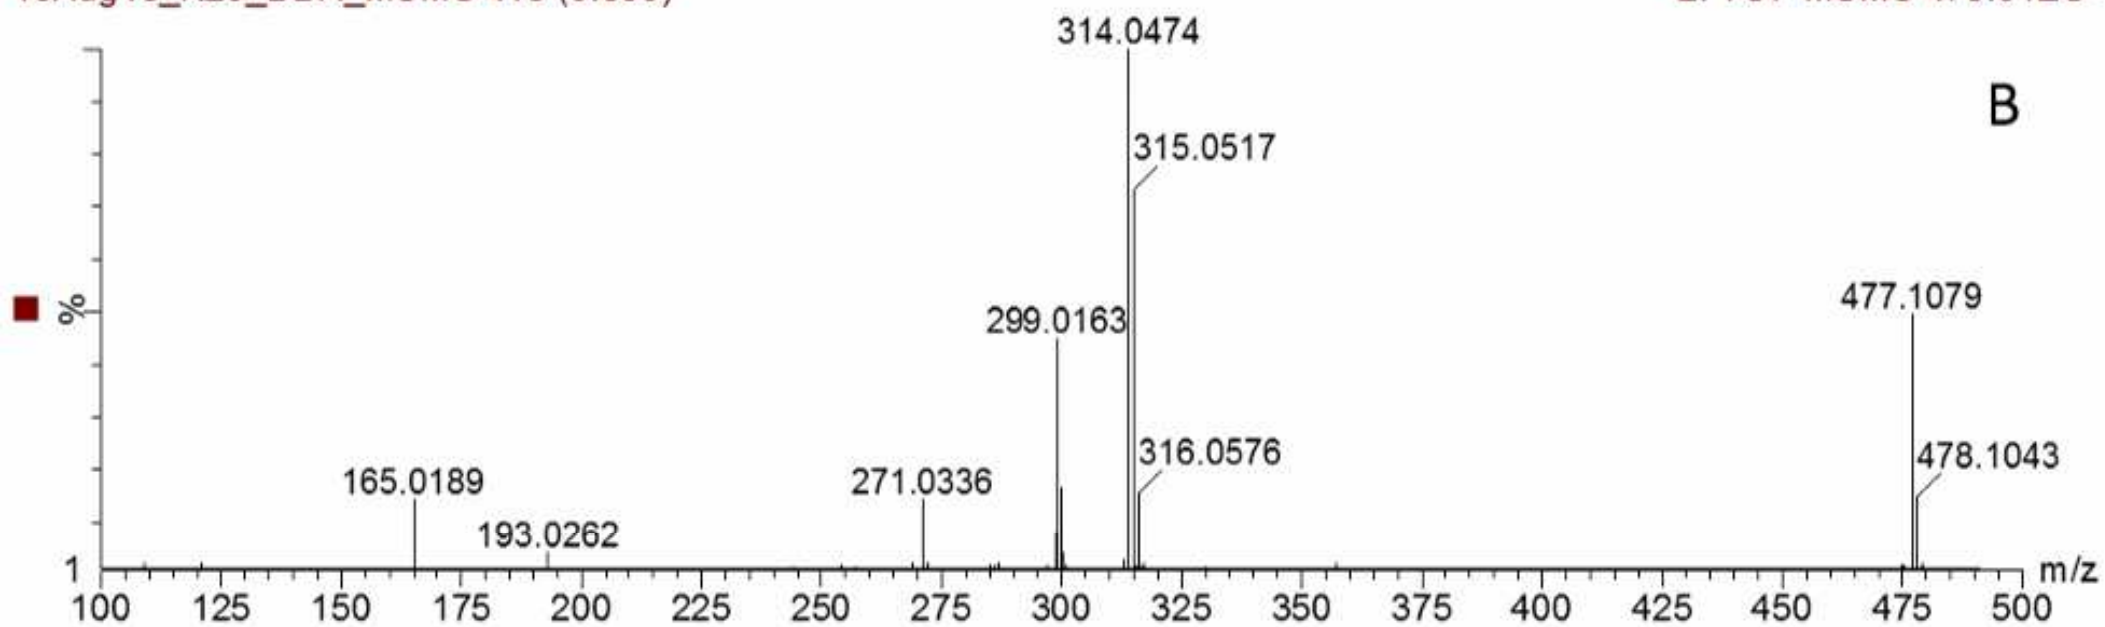

Supplement: s1 [file s1]
